# Supplementary material for: Natural Factors on Heterogenetic Accumulations of PTEs in Sloping Farmland in a Typical Small Mountainous Watershed in Southwest China
Source: MDPI journal article supplement (doi:10.3390/separations9060149), 2022-06-10
Supplement: s1 [file s1]

---

**Supplementary Materials**
**Table S1.** The interaction results of V by the interaction detector of geographic detector.

|                         | Altitude | Slope aspect | Slope gradient | Strata | Soil type | pH    | Organic matter | Clay content | Agricultural land type | Distance to settlements |
|-------------------------|----------|--------------|----------------|--------|-----------|-------|----------------|--------------|------------------------|-------------------------|
| Altitude                | 0.205    |              |                |        |           |       |                |              |                        |                         |
| Slope aspect            | 0.343    | 0.018        |                |        |           |       |                |              |                        |                         |
| Slope gradient          | 0.267    | 0.144        | 0.070          |        |           |       |                |              |                        |                         |
| Strata                  | 0.312    | 0.189        | 0.243          | 0.133  |           |       |                |              |                        |                         |
| Soil type               | 0.315    | 0.180        | 0.165          | 0.279  | 0.074     |       |                |              |                        |                         |
| pH                      | 0.414    | 0.263        | 0.322          | 0.332  | 0.213     | 0.149 |                |              |                        |                         |
| Organic matter          | 0.458    | 0.158        | 0.265          | 0.233  | 0.121     | 0.259 | 0.046          |              |                        |                         |
| Clay content            | 0.449    | 0.303        | 0.372          | 0.310  | 0.405     | 0.424 | 0.429          | 0.246        |                        |                         |
| Agricultural land type  | 0.460    | 0.290        | 0.284          | 0.380  | 0.222     | 0.296 | 0.348          | 0.462        | 0.172                  |                         |
| Distance to settlements | 0.450    | 0.248        | 0.187          | 0.190  | 0.306     | 0.353 | 0.205          | 0.402        | 0.507                  | 0.047                   |

---

**Table S2.** The interaction results of Cr by the interaction detector of geographic detector.

|                         | Altitude | Slope aspect | Slope gradient | Strata | Soil type | pH    | Organic matter | Clay content | Agricultural land type | Distance to settlements |
|-------------------------|----------|--------------|----------------|--------|-----------|-------|----------------|--------------|------------------------|-------------------------|
| Altitude                | 0.161    |              |                |        |           |       |                |              |                        |                         |
| Slope aspect            | 0.308    | 0.026        |                |        |           |       |                |              |                        |                         |
| Slope gradient          | 0.229    | 0.134        | 0.061          |        |           |       |                |              |                        |                         |
| Strata                  | 0.283    | 0.233        | 0.287          | 0.159  |           |       |                |              |                        |                         |
| Soil type               | 0.264    | 0.141        | 0.148          | 0.285  | 0.044     |       |                |              |                        |                         |
| pH                      | 0.357    | 0.198        | 0.252          | 0.301  | 0.145     | 0.092 |                |              |                        |                         |
| Organic matter          | 0.469    | 0.156        | 0.289          | 0.267  | 0.077     | 0.158 | 0.024          |              |                        |                         |
| Clay content            | 0.427    | 0.312        | 0.344          | 0.292  | 0.341     | 0.367 | 0.420          | 0.227        |                        |                         |
| Agricultural land type  | 0.407    | 0.189        | 0.207          | 0.337  | 0.148     | 0.186 | 0.266          | 0.385        | 0.097                  |                         |
| Distance to settlements | 0.435    | 0.292        | 0.236          | 0.242  | 0.300     | 0.297 | 0.234          | 0.382        | 0.320                  | 0.071                   |

**Table S3.** The interaction results of Co by the interaction detector of geographic detector.

|                         | Altitude | Slope aspect | Slope gradient | Strata | Soil type | pH    | Organic matter | Clay content | Agricultural land type | Distance to settlements |
|-------------------------|----------|--------------|----------------|--------|-----------|-------|----------------|--------------|------------------------|-------------------------|
| Altitude                | 0.068    |              |                |        |           |       |                |              |                        |                         |
| Slope aspect            | 0.243    | 0.013        |                |        |           |       |                |              |                        |                         |
| Slope gradient          | 0.278    | 0.083        | 0.027          |        |           |       |                |              |                        |                         |
| Strata                  | 0.207    | 0.209        | 0.199          | 0.143  |           |       |                |              |                        |                         |
| Soil type               | 0.213    | 0.093        | 0.125          | 0.243  | 0.055     |       |                |              |                        |                         |
| pH                      | 0.275    | 0.202        | 0.166          | 0.232  | 0.210     | 0.128 |                |              |                        |                         |
| Organic matter          | 0.324    | 0.165        | 0.122          | 0.288  | 0.102     | 0.254 | 0.036          |              |                        |                         |
| Clay content            | 0.469    | 0.427        | 0.393          | 0.467  | 0.355     | 0.384 | 0.476          | 0.313        |                        |                         |
| Agricultural land type  | 0.249    | 0.182        | 0.187          | 0.359  | 0.209     | 0.267 | 0.256          | 0.453        | 0.147                  |                         |
| Distance to settlements | 0.370    | 0.355        | 0.196          | 0.250  | 0.221     | 0.296 | 0.247          | 0.494        | 0.328                  | 0.102                   |

**Table S4.** The interaction results of Ni by the interaction detector of geographic detector.

|                         | Altitude | Slope aspect | Slope gradient | Strata | Soil type | pH    | Organic matter | Clay content | Agricultural land type | Distance to settlements |
|-------------------------|----------|--------------|----------------|--------|-----------|-------|----------------|--------------|------------------------|-------------------------|
| Altitude                | 0.172    |              |                |        |           |       |                |              |                        |                         |
| Slope aspect            | 0.462    | 0.037        |                |        |           |       |                |              |                        |                         |
| Slope gradient          | 0.279    | 0.140        | 0.004          |        |           |       |                |              |                        |                         |
| Strata                  | 0.494    | 0.499        | 0.509          | 0.422  |           |       |                |              |                        |                         |
| Soil type               | 0.375    | 0.091        | 0.176          | 0.517  | 0.037     |       |                |              |                        |                         |
| pH                      | 0.393    | 0.189        | 0.139          | 0.450  | 0.116     | 0.053 |                |              |                        |                         |
| Organic matter          | 0.563    | 0.178        | 0.233          | 0.548  | 0.077     | 0.141 | 0.006          |              |                        |                         |
| Clay content            | 0.587    | 0.540        | 0.520          | 0.579  | 0.454     | 0.491 | 0.590          | 0.432        |                        |                         |
| Agricultural land type  | 0.525    | 0.102        | 0.098          | 0.552  | 0.088     | 0.121 | 0.212          | 0.531        | 0.025                  |                         |
| Distance to settlements | 0.599    | 0.276        | 0.216          | 0.521  | 0.426     | 0.210 | 0.262          | 0.542        | 0.213                  | 0.078                   |

**Table S5.** The interaction results of Cu by the interaction detector of geographic detector.

|                         | Altitude | Slope aspect | Slope gradient | Strata | Soil type | pH    | Organic matter | Clay content | Agricultural land type | Distance to settlements |
|-------------------------|----------|--------------|----------------|--------|-----------|-------|----------------|--------------|------------------------|-------------------------|
| Altitude                | 0.261    |              |                |        |           |       |                |              |                        |                         |
| Slope aspect            | 0.492    | 0.025        |                |        |           |       |                |              |                        |                         |
| Slope gradient          | 0.447    | 0.082        | 0.025          |        |           |       |                |              |                        |                         |
| Strata                  | 0.468    | 0.454        | 0.440          | 0.412  |           |       |                |              |                        |                         |
| Soil type               | 0.413    | 0.098        | 0.100          | 0.467  | 0.037     |       |                |              |                        |                         |
| pH                      | 0.542    | 0.177        | 0.114          | 0.467  | 0.136     | 0.048 |                |              |                        |                         |
| Organic matter          | 0.452    | 0.160        | 0.188          | 0.488  | 0.101     | 0.168 | 0.053          |              |                        |                         |
| Clay content            | 0.529    | 0.294        | 0.204          | 0.528  | 0.191     | 0.196 | 0.410          | 0.109        |                        |                         |
| Agricultural land type  | 0.384    | 0.133        | 0.135          | 0.564  | 0.148     | 0.121 | 0.231          | 0.257        | 0.076                  |                         |
| Distance to settlements | 0.575    | 0.360        | 0.112          | 0.447  | 0.204     | 0.212 | 0.194          | 0.321        | 0.180                  | 0.044                   |

**Table S6.** The interaction results of Zn by the interaction detector of geographic detector.

|                         | Altitude | Slope aspect | Slope gradient | Strata | Soil type | pH    | Organic matter | Clay content | Agricultural land type | Distance to settlements |
|-------------------------|----------|--------------|----------------|--------|-----------|-------|----------------|--------------|------------------------|-------------------------|
| Altitude                | 0.173    |              |                |        |           |       |                |              |                        |                         |
| Slope aspect            | 0.321    | 0.015        |                |        |           |       |                |              |                        |                         |
| Slope gradient          | 0.252    | 0.082        | 0.011          |        |           |       |                |              |                        |                         |
| Strata                  | 0.224    | 0.049        | 0.047          | 0.029  |           |       |                |              |                        |                         |
| Soil type               | 0.219    | 0.038        | 0.052          | 0.044  | 0.010     |       |                |              |                        |                         |
| pH                      | 0.250    | 0.105        | 0.090          | 0.068  | 0.079     | 0.042 |                |              |                        |                         |
| Organic matter          | 0.455    | 0.154        | 0.093          | 0.099  | 0.091     | 0.164 | 0.047          |              |                        |                         |
| Clay content            | 0.425    | 0.161        | 0.232          | 0.145  | 0.159     | 0.195 | 0.279          | 0.087        |                        |                         |
| Agricultural land type  | 0.258    | 0.113        | 0.077          | 0.083  | 0.062     | 0.074 | 0.218          | 0.186        | 0.045                  |                         |
| Distance to settlements | 0.431    | 0.129        | 0.086          | 0.073  | 0.115     | 0.134 | 0.229          | 0.213        | 0.116                  | 0.040                   |

**Table S7.** The interaction results of As by the interaction detector of geographic detector.

|                         | Altitude | Slope aspect | Slope gradient | Strata | Soil type | pH    | Organic matter | Clay content | Agricultural land type | Distance to settlements |
|-------------------------|----------|--------------|----------------|--------|-----------|-------|----------------|--------------|------------------------|-------------------------|
| Altitude                | 0.075    |              |                |        |           |       |                |              |                        |                         |
| Slope aspect            | 0.285    | 0.087        |                |        |           |       |                |              |                        |                         |
| Slope gradient          | 0.122    | 0.129        | 0.008          |        |           |       |                |              |                        |                         |
| Strata                  | 0.092    | 0.132        | 0.043          | 0.028  |           |       |                |              |                        |                         |
| Soil type               | 0.111    | 0.112        | 0.037          | 0.040  | 0.006     |       |                |              |                        |                         |
| pH                      | 0.221    | 0.273        | 0.220          | 0.118  | 0.155     | 0.060 |                |              |                        |                         |
| Organic matter          | 0.194    | 0.241        | 0.094          | 0.083  | 0.065     | 0.173 | 0.038          |              |                        |                         |
| Clay content            | 0.180    | 0.238        | 0.099          | 0.064  | 0.084     | 0.177 | 0.282          | 0.031        |                        |                         |
| Agricultural land type  | 0.256    | 0.252        | 0.235          | 0.165  | 0.149     | 0.198 | 0.365          | 0.214        | 0.107                  |                         |
| Distance to settlements | 0.231    | 0.225        | 0.142          | 0.113  | 0.098     | 0.300 | 0.302          | 0.326        | 0.282                  | 0.074                   |

**Table S8.** The interaction results of Mo by the interaction detector of geographic detector.

|                         | Altitude | Slope aspect | Slope gradient | Strata | Soil type | pH    | Organic matter | Clay content | Agricultural land type | Distance to settlements |
|-------------------------|----------|--------------|----------------|--------|-----------|-------|----------------|--------------|------------------------|-------------------------|
| Altitude                | 0.129    |              |                |        |           |       |                |              |                        |                         |
| Slope aspect            | 0.260    | 0.026        |                |        |           |       |                |              |                        |                         |
| Slope gradient          | 0.187    | 0.110        | 0.037          |        |           |       |                |              |                        |                         |
| Strata                  | 0.163    | 0.087        | 0.070          | 0.024  |           |       |                |              |                        |                         |
| Soil type               | 0.214    | 0.094        | 0.061          | 0.095  | 0.014     |       |                |              |                        |                         |
| pH                      | 0.393    | 0.248        | 0.272          | 0.299  | 0.211     | 0.174 |                |              |                        |                         |
| Organic matter          | 0.252    | 0.172        | 0.165          | 0.102  | 0.050     | 0.246 | 0.022          |              |                        |                         |
| Clay content            | 0.325    | 0.235        | 0.193          | 0.209  | 0.231     | 0.303 | 0.455          | 0.119        |                        |                         |
| Agricultural land type  | 0.316    | 0.299        | 0.250          | 0.296  | 0.226     | 0.305 | 0.326          | 0.367        | 0.200                  |                         |
| Distance to settlements | 0.354    | 0.243        | 0.123          | 0.095  | 0.212     | 0.317 | 0.280          | 0.359        | 0.429                  | 0.066                   |



**Table S9.** The interaction results of Cd by the interaction detector of geographic detector.

|                         | Altitude | Slope aspect | Slope gradient | Strata | Soil type | pH    | Organic matter | Clay content | Agricultural land type | Distance to settlements |
|-------------------------|----------|--------------|----------------|--------|-----------|-------|----------------|--------------|------------------------|-------------------------|
| Altitude                | 0.049    |              |                |        |           |       |                |              |                        |                         |
| Slope aspect            | 0.161    | 0.038        |                |        |           |       |                |              |                        |                         |
| Slope gradient          | 0.120    | 0.109        | 0.018          |        |           |       |                |              |                        |                         |
| Strata                  | 0.070    | 0.105        | 0.064          | 0.010  |           |       |                |              |                        |                         |
| Soil type               | 0.086    | 0.059        | 0.044          | 0.066  | 0.010     |       |                |              |                        |                         |
| pH                      | 0.136    | 0.151        | 0.109          | 0.077  | 0.086     | 0.058 |                |              |                        |                         |
| Organic matter          | 0.379    | 0.224        | 0.198          | 0.184  | 0.173     | 0.347 | 0.122          |              |                        |                         |
| Clay content            | 0.199    | 0.201        | 0.078          | 0.083  | 0.064     | 0.175 | 0.439          | 0.015        |                        |                         |
| Agricultural land type  | 0.205    | 0.136        | 0.078          | 0.109  | 0.072     | 0.116 | 0.279          | 0.112        | 0.040                  |                         |
| Distance to settlements | 0.265    | 0.187        | 0.139          | 0.094  | 0.115     | 0.146 | 0.367          | 0.220        | 0.143                  | 0.048                   |

**Table S10.** The interaction results of Sb by the interaction detector of geographic detector.

|                         | Altitude | Slope aspect | Slope gradient | Strata | Soil type | pH    | Organic matter | Clay content | Agricultural land type | Distance to settlements |
|-------------------------|----------|--------------|----------------|--------|-----------|-------|----------------|--------------|------------------------|-------------------------|
| Altitude                | 0.109    |              |                |        |           |       |                |              |                        |                         |
| Slope aspect            | 0.362    | 0.086        |                |        |           |       |                |              |                        |                         |
| Slope gradient          | 0.132    | 0.112        | 0.012          |        |           |       |                |              |                        |                         |
| Strata                  | 0.116    | 0.110        | 0.023          | 0.005  |           |       |                |              |                        |                         |
| Soil type               | 0.133    | 0.207        | 0.075          | 0.072  | 0.056     |       |                |              |                        |                         |
| pH                      | 0.417    | 0.426        | 0.329          | 0.134  | 0.402     | 0.099 |                |              |                        |                         |
| Organic matter          | 0.173    | 0.208        | 0.079          | 0.029  | 0.126     | 0.272 | 0.014          |              |                        |                         |
| Clay content            | 0.197    | 0.166        | 0.097          | 0.046  | 0.122     | 0.244 | 0.148          | 0.034        |                        |                         |
| Agricultural land type  | 0.201    | 0.206        | 0.107          | 0.044  | 0.119     | 0.266 | 0.207          | 0.140        | 0.031                  |                         |
| Distance to settlements | 0.147    | 0.201        | 0.063          | 0.049  | 0.089     | 0.297 | 0.093          | 0.121        | 0.122                  | 0.037                   |

**Table S11.** The interaction results of TI by the interaction detector of geographic detector.

|                         | Altitude | Slope aspect | Slope gradient | Strata | Soil type | pH    | Organic matter | Clay content | Agricultural land type | Distance to settlements |
|-------------------------|----------|--------------|----------------|--------|-----------|-------|----------------|--------------|------------------------|-------------------------|
| Altitude                | 0.090    |              |                |        |           |       |                |              |                        |                         |
| Slope aspect            | 0.344    | 0.095        |                |        |           |       |                |              |                        |                         |
| Slope gradient          | 0.132    | 0.189        | 0.042          |        |           |       |                |              |                        |                         |
| Strata                  | 0.097    | 0.125        | 0.051          | 0.006  |           |       |                |              |                        |                         |
| Soil type               | 0.132    | 0.175        | 0.079          | 0.046  | 0.030     |       |                |              |                        |                         |
| pH                      | 0.144    | 0.169        | 0.121          | 0.028  | 0.094     | 0.010 |                |              |                        |                         |
| Organic matter          | 0.154    | 0.182        | 0.128          | 0.030  | 0.086     | 0.134 | 0.010          |              |                        |                         |
| Clay content            | 0.228    | 0.205        | 0.118          | 0.042  | 0.128     | 0.156 | 0.132          | 0.021        |                        |                         |
| Agricultural land type  | 0.180    | 0.205        | 0.121          | 0.057  | 0.088     | 0.092 | 0.114          | 0.156        | 0.033                  |                         |
| Distance to settlements | 0.187    | 0.222        | 0.078          | 0.059  | 0.088     | 0.098 | 0.163          | 0.183        | 0.143                  | 0.044                   |

**Table S12.** The interaction results of Hg by the interaction detector of geographic detector.

|                         | Altitude | Slope aspect | Slope gradient | Strata | Soil type | pH    | Organic matter | Clay content | Agricultural land type | Distance to settlements |
|-------------------------|----------|--------------|----------------|--------|-----------|-------|----------------|--------------|------------------------|-------------------------|
| Altitude                | 0.165    |              |                |        |           |       |                |              |                        |                         |
| Slope aspect            | 0.431    | 0.119        |                |        |           |       |                |              |                        |                         |
| Slope gradient          | 0.241    | 0.341        | 0.069          |        |           |       |                |              |                        |                         |
| Strata                  | 0.173    | 0.148        | 0.083          | 0.010  |           |       |                |              |                        |                         |
| Soil type               | 0.189    | 0.253        | 0.166          | 0.092  | 0.074     |       |                |              |                        |                         |
| pH                      | 0.267    | 0.321        | 0.158          | 0.074  | 0.213     | 0.047 |                |              |                        |                         |
| Organic matter          | 0.290    | 0.261        | 0.241          | 0.068  | 0.167     | 0.171 | 0.048          |              |                        |                         |
| Clay content            | 0.349    | 0.356        | 0.212          | 0.099  | 0.236     | 0.169 | 0.182          | 0.083        |                        |                         |
| Agricultural land type  | 0.283    | 0.232        | 0.170          | 0.059  | 0.158     | 0.107 | 0.159          | 0.205        | 0.034                  |                         |
| Distance to settlements | 0.302    | 0.255        | 0.271          | 0.118  | 0.162     | 0.188 | 0.294          | 0.343        | 0.168                  | 0.090                   |
